# Supplementary material
Source: PubMed Central journal article supplement (PMC3972007)
Supplement: NIHMS17915-supplement-SI_-_RHM1_-_Boot.pdf [file NIHMS17915-supplement-SI_-_RHM1_-_Boot.pdf]

## Highly *N*-methylated Linear Peptides Produced by an Atypical Sponge-derived *Acremonium* Strain

Claudia M. Boot,<sup>†</sup> Karen Tenney,<sup>†</sup> Frederick A. Valeriote,<sup>‡</sup> and Phillip Crews<sup>†,\*</sup>

*Department of Chemistry and Biochemistry and Department of Ocean Sciences, University of California, Santa Cruz, CA 95064*  
*Henry Ford Health System, Department of Internal Medicine, Division of Hematology and Oncology, Detroit, MI 48202*

Figure S1: Flow chart indicating the isolation scheme and potency for active fractions from 021172cKZ.

Figure S2a: FAB-MS of **3** (*m/z* 500-2100).

Figure S2b: FAB-MS of **3** (*m/z* 100-480).

Figure S3: <sup>1</sup>H NMR spectrum for **3**.

Figure S4: <sup>13</sup>C NMR spectrum for **3**.

Figure S5: <sup>1</sup>H NMR spectrum for **1**.

Figure S6: <sup>13</sup>C NMR spectrum for **1**.

Figure S7: gHMBC spectrum for **1**.

Figure S8: Expansion of downfield region of gHMBC spectrum for **1**.

Figure S9: Expansion of upfield region of gHMBC spectrum for **1**.

Figure S10: gCOSY spectrum for **1**.

Figure S11: TOCSY spectrum for **1**.

Figure S12: <sup>1</sup>H NMR spectrum for **2**.

Figure S13: <sup>13</sup>C NMR spectrum for **2**.

Figure S14: gHMBC spectrum for **2**.

Figure S15: Expanded regions of gHMBC spectrum for **2** a.) alpha protons with aliphatic carbons b.) alpha and aliphatic protons with carbonyl carbons.

Figure S16: Expansion of upfield region of gHMBC spectrum for **2**.

Figure S17: gCOSY spectrum for **2**.

Figure S18: TOCSY spectrum for **2**.

Figure S19: <sup>1</sup>H NMR (DMSO-*d*<sub>6</sub>, 500 MHz) of selected regions for RHM1 (**1**) and RHM2 (**2**) illustrating the presence of rotational isomers (codes show rotamers A-D).

Figure S20: Selected regions of <sup>13</sup>C NMR (125 MHz, DMSO-*d*<sub>6</sub>) illustrating rotational isomers for RHM1 (**1**) and RHM2 (**2**).

---

<sup>†</sup> University of California, Santa Cruz. <sup>‡</sup> Ford Health System.

\* To whom correspondence should be addressed. Tel: 831-459-2603. Fax: 831-459-2935. Email: phil@chemistry.ucsc.edu

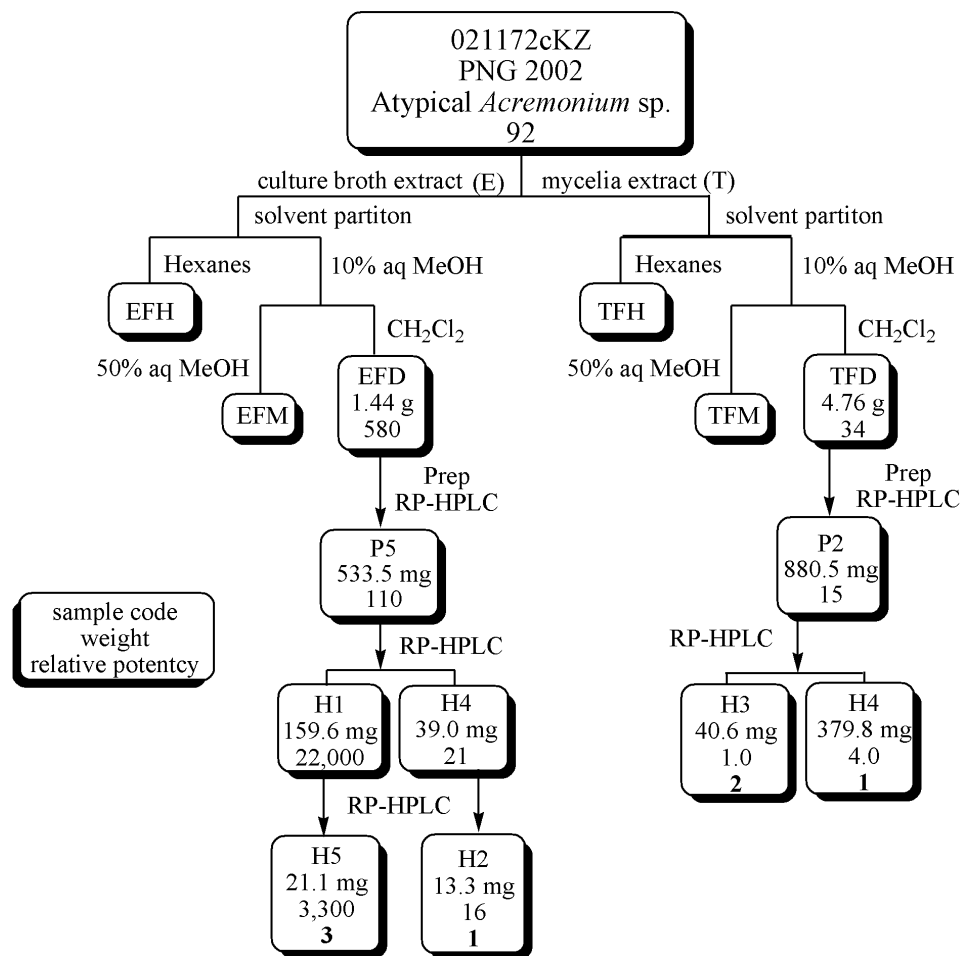

Figure S1. Flow chart indicating the isolation scheme and potency for active fractions from 021172cKZ. The potency value was calculated by dividing the reciprocal of dilution required for a 500 zone units of inhibition by the concentration of the sample in mg/ml  $\times 100$ . The relative potency was calculated by setting the value for **2** as 1.0.

[ Mass Spectrum ]  
 Data : J5.1075-001 Date : 01-Jul-2005 14:21  
 Sample: 021172cKZEFOP5H115  
 Note : in NBA  
 Inlet : Reserv. Ion Mode : FAB+  
 Spectrum Type : Normal Ion [MF-Linear]  
 RT : 0.46 min Scan# : (1,6)  
 BP : m/z 1648.9763 Int. : 59.84  
 Output m/z range : 500.0000 to 2100.0000 Cut Level : 0.00 %  
 3714309

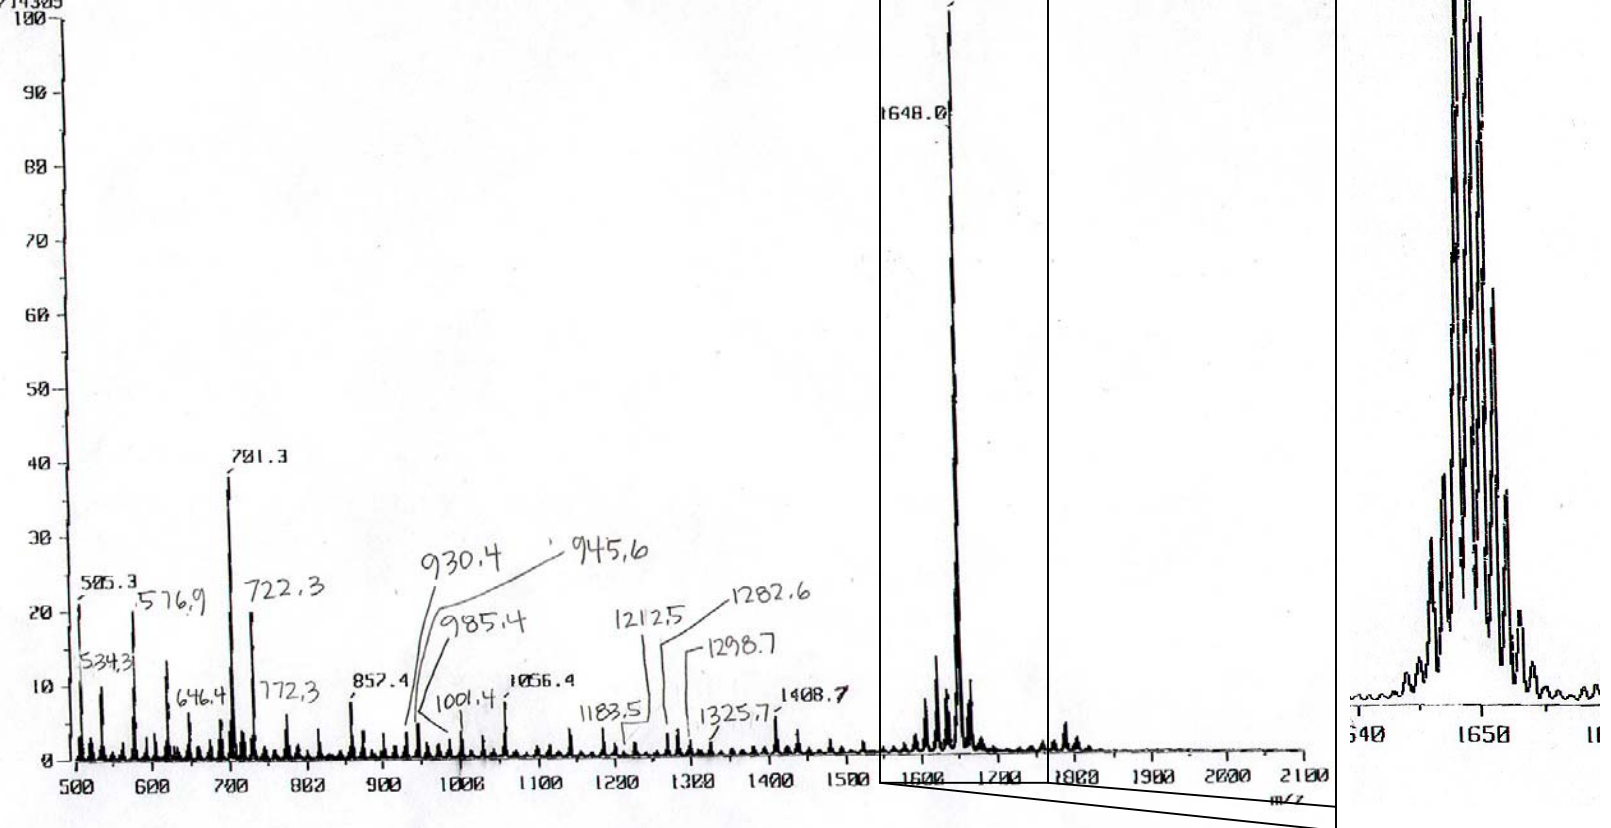

Figure S2a. FAB-MS of 3 (m/z 500-2100).

[ Mass Spectrum ]  
Data : JS.1875-002 Date : 01-Jul-2005 14:23  
Sample: 021172cKZEFDP5H1H5  
Note : an NDA  
Inlet : Direct Ion Mode : FAB+  
Spectrum Type : Normal Ion [MF-Linear]  
RT : 0.94 min Scan# : (1,10)  
BP : m/z 125.0352 Int. : 2.17  
Output m/z range : 100.0000 to 483.2344 Cut Level : 0.00 %

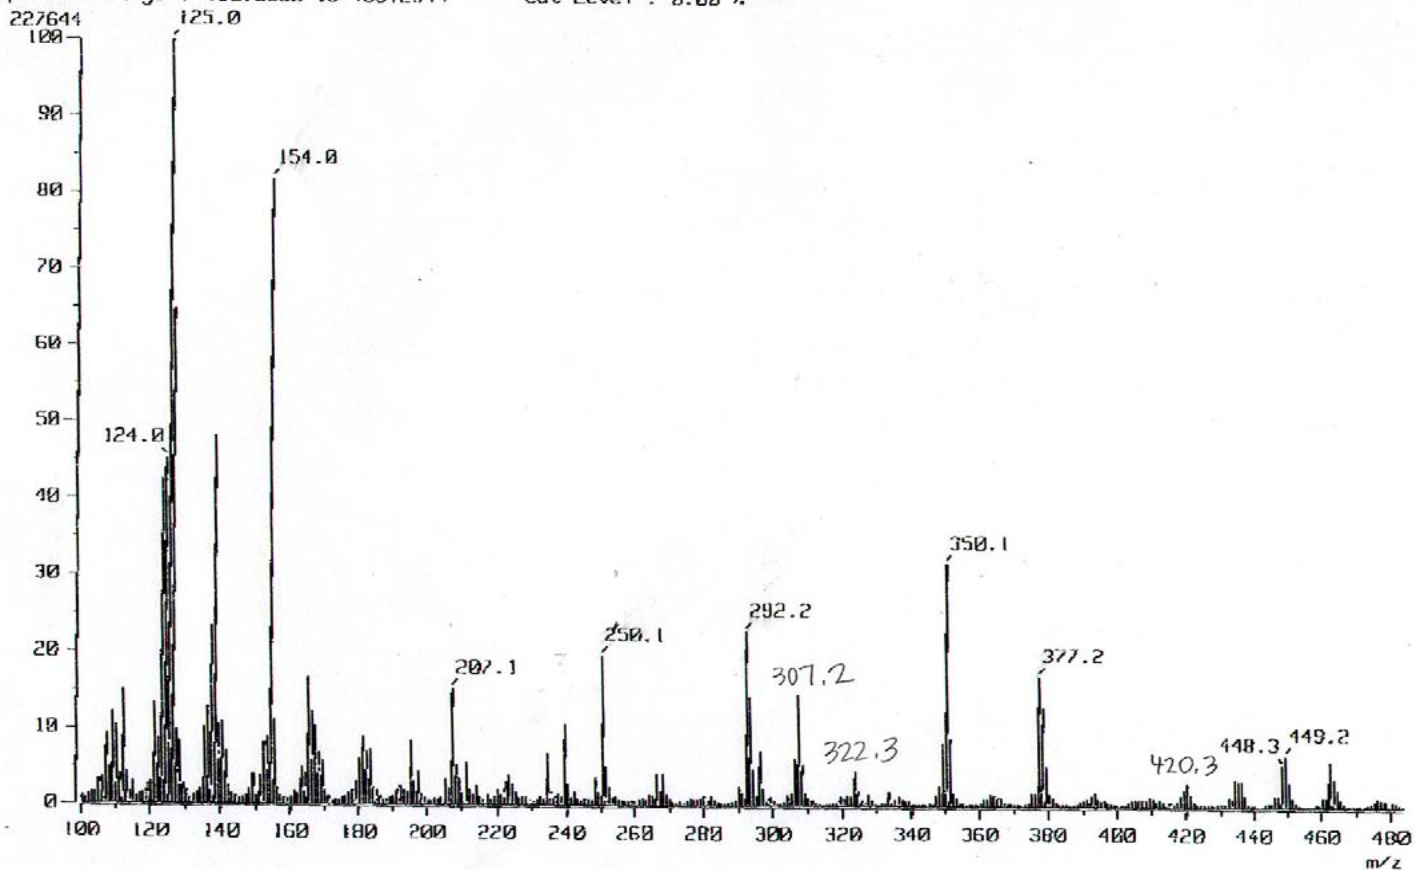

Figure S2b. FAB-MS of 3 ( $m/z$  100-480).

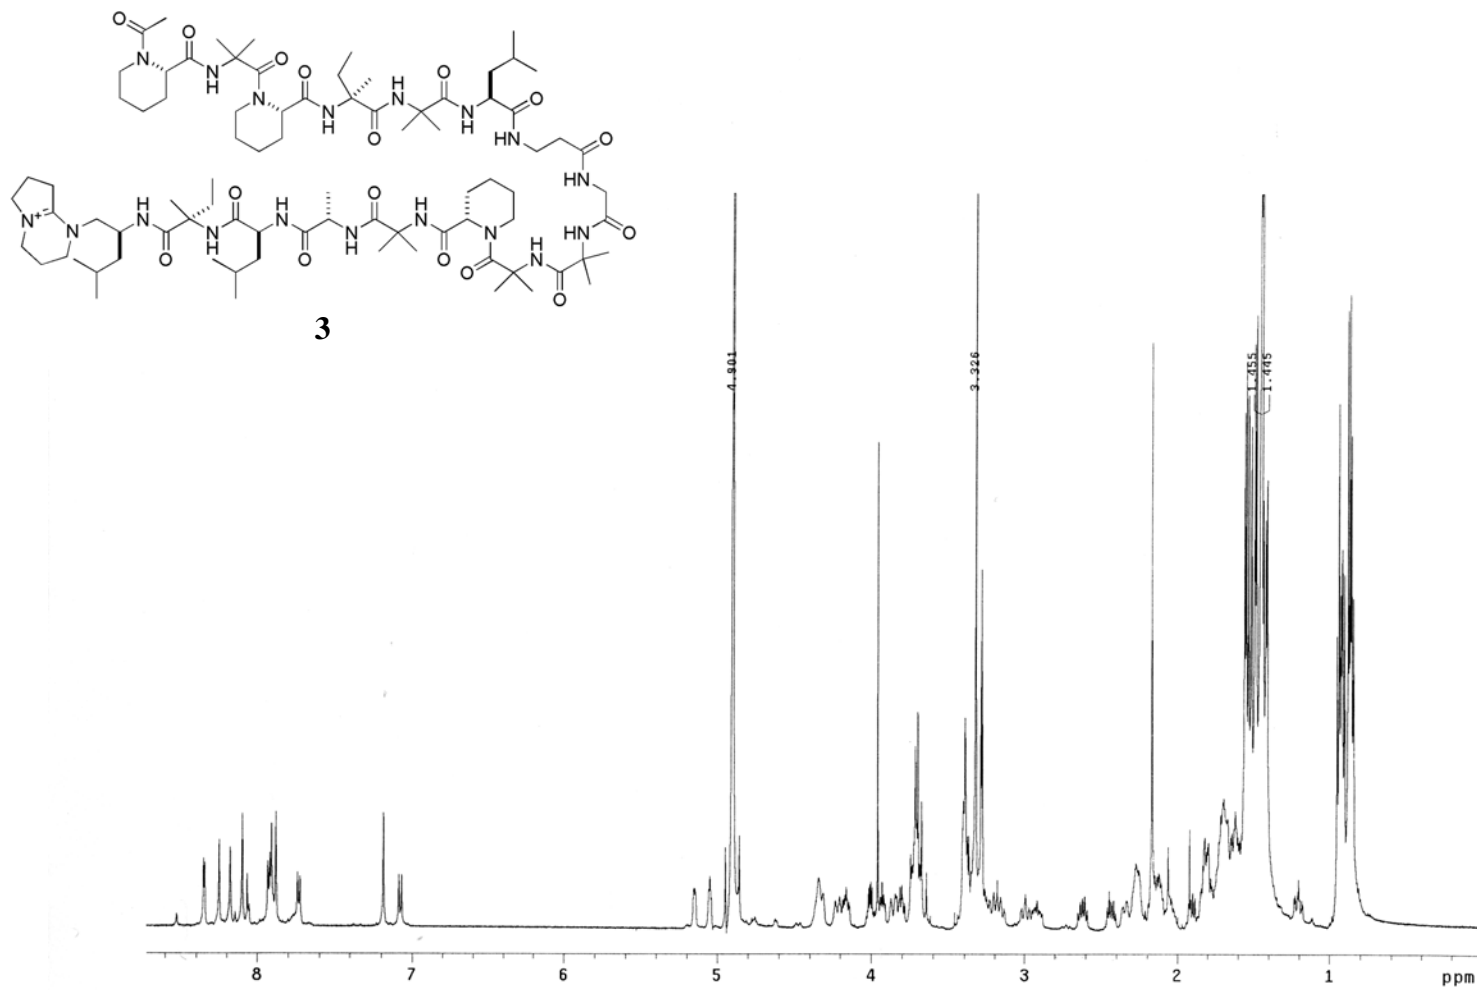

Figure S3. <sup>1</sup>H NMR for efrapeptin G (3).

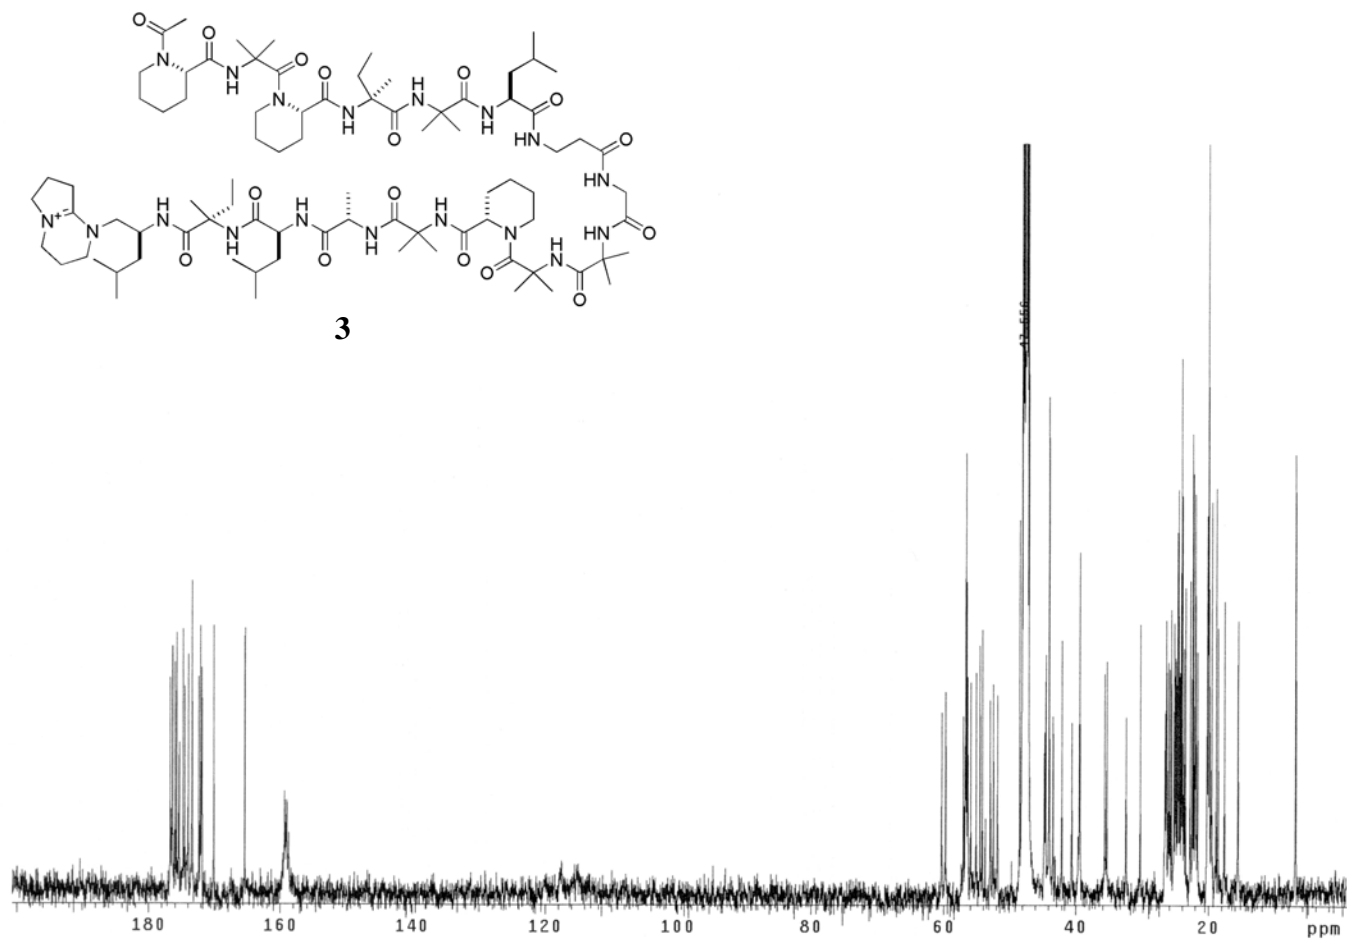

Figure S4.  $^{13}\text{C}$  NMR for efrapeptin G (**3**).

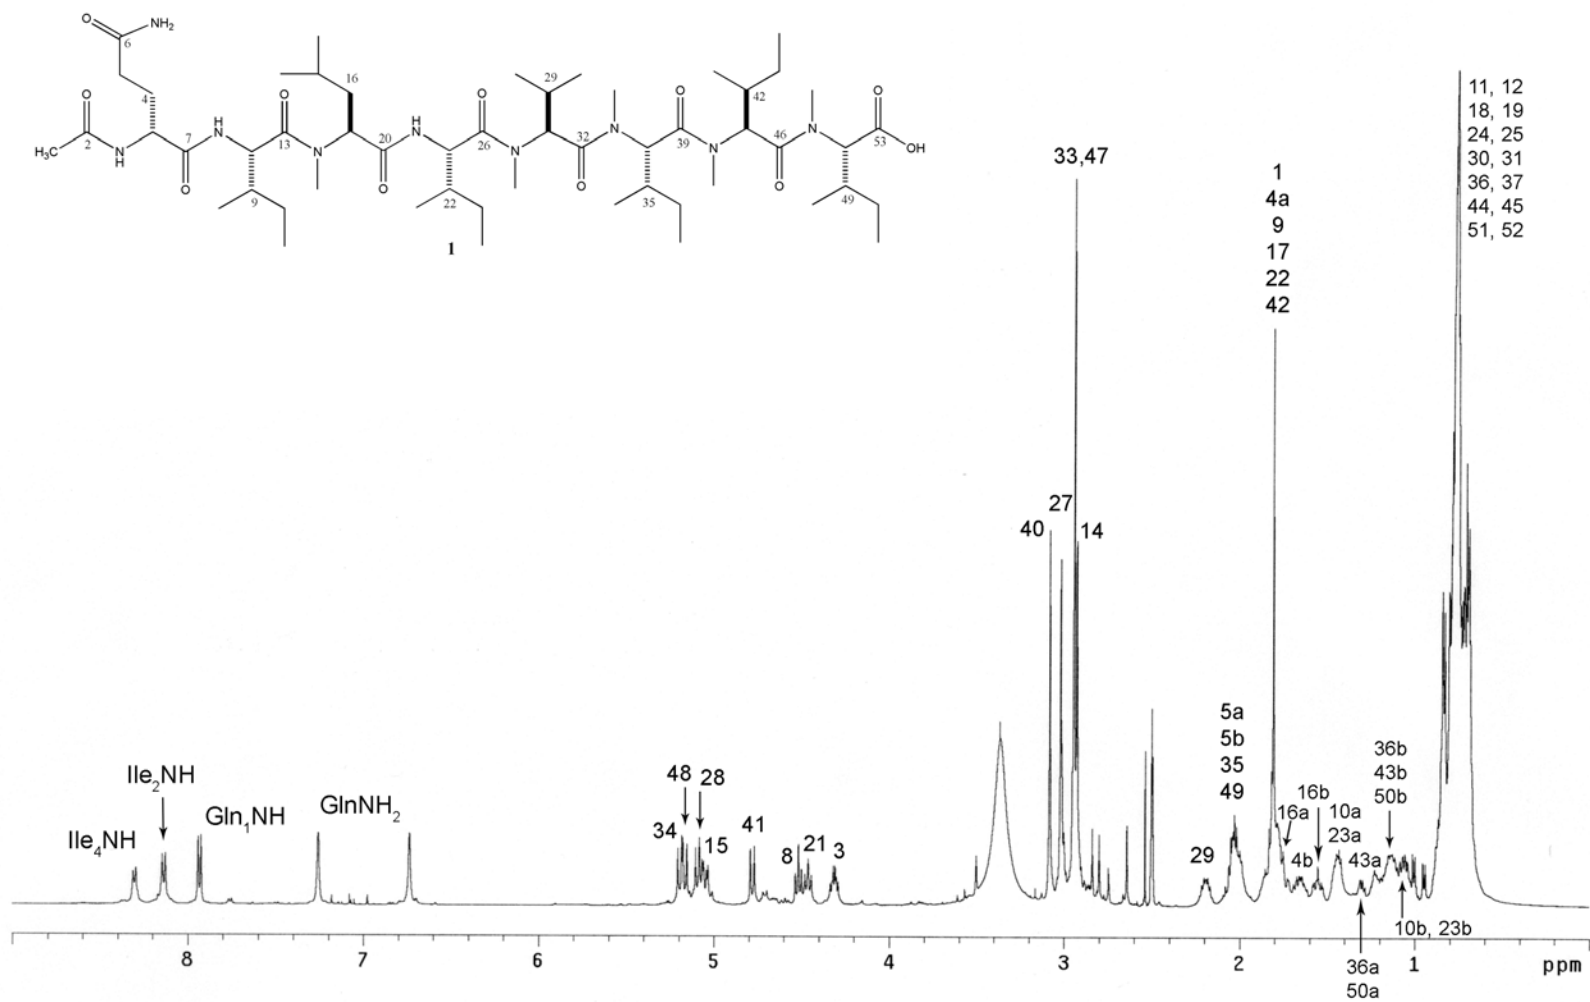

Figure S5. <sup>1</sup>H NMR spectrum for **1**.

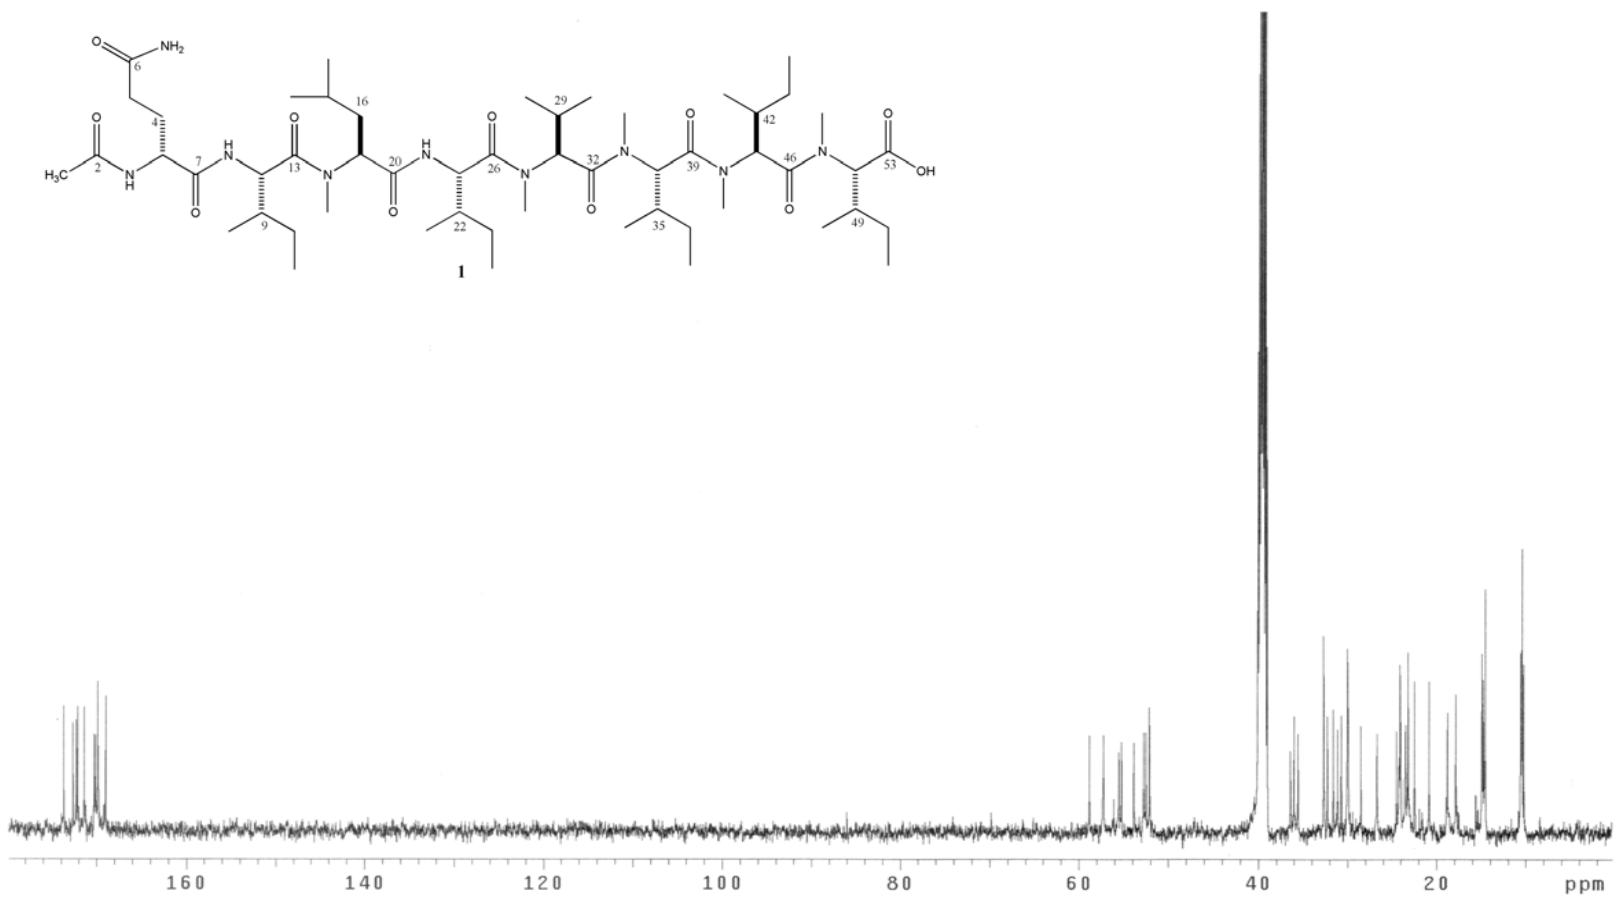

Figure S6.  $^{13}\text{C}$  NMR spectrum for **1**.



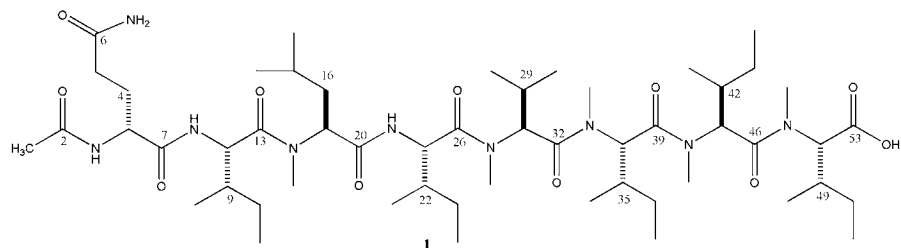

```

pp      2048  9514  40
f0      4200  5210  0
ss      32  GRADIENTS  0
d1      1.000  0.1411  0.001000
n2  ACQUISITION  70  0.1113  0.001000
sw1     32000.0  0.13  0.001000
n1      300  0.5tab  0.000500
phase   0  F2 PROCESSING  1.2
tr      TRANSMITTER  0  0.012
tfa     499.786  f0  2048
tof     -366.0  f1  PROCESSING
fmer     6.500  sb13  not used
pw      DECOUPLER  f01  102.4
dn      C13  0  DISPLAY  102.4
dof     0  0  -1617.8
dm     0  0  -2489.2
dms     0  0  -4157.9
dof     24800  0.1  32000.0
dmer     0  0  2846.2
pwr     0  0  1548.4
dwx     11.000  rf1  0118.3
j1xh    HMBC  140.0  rfp1  4960.4
jnxh     8.0  wc  170.0
          sc  0
          wc2  110.0
          sc2  0
          vs  1.92325e+07
          tr  2
          at  av
  
```

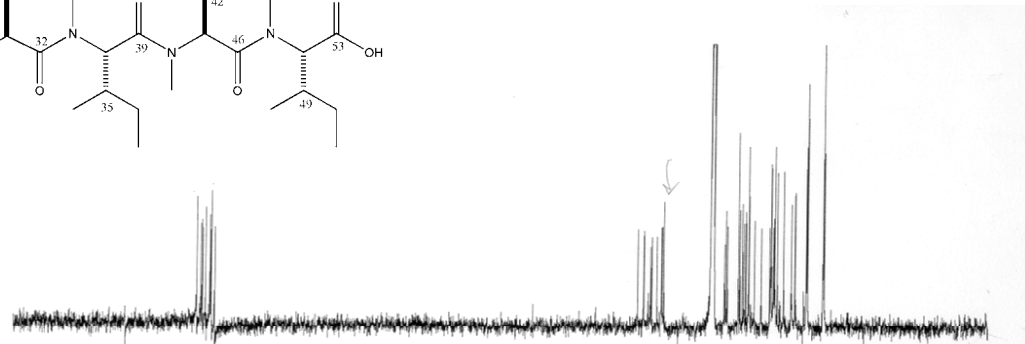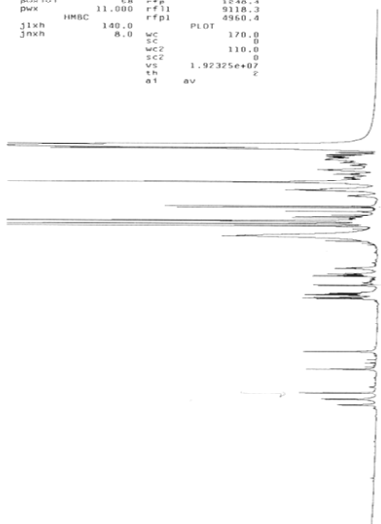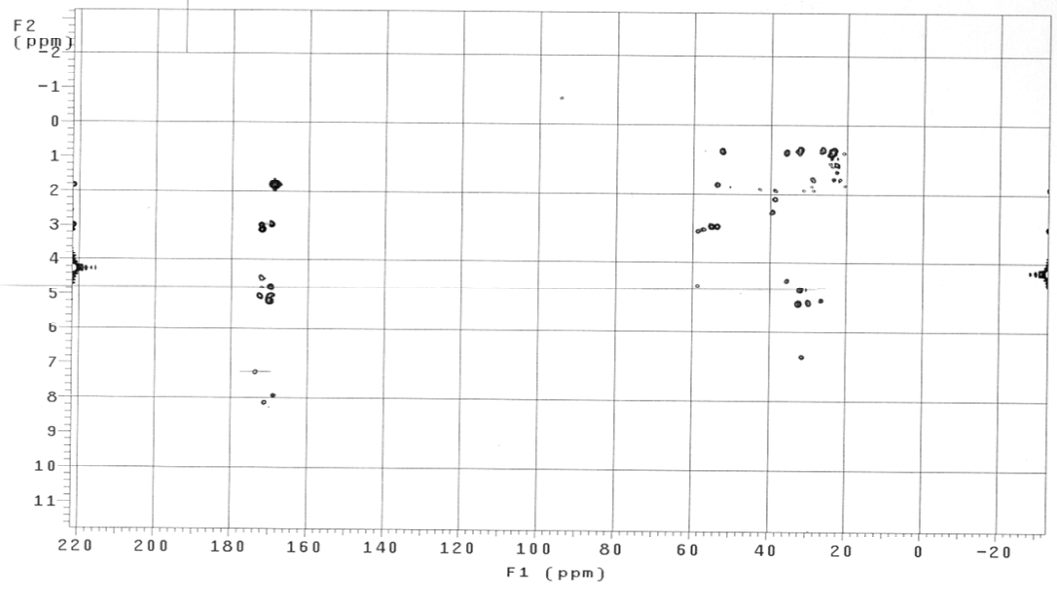

Figure S7. gHMBC spectrum for **1**.

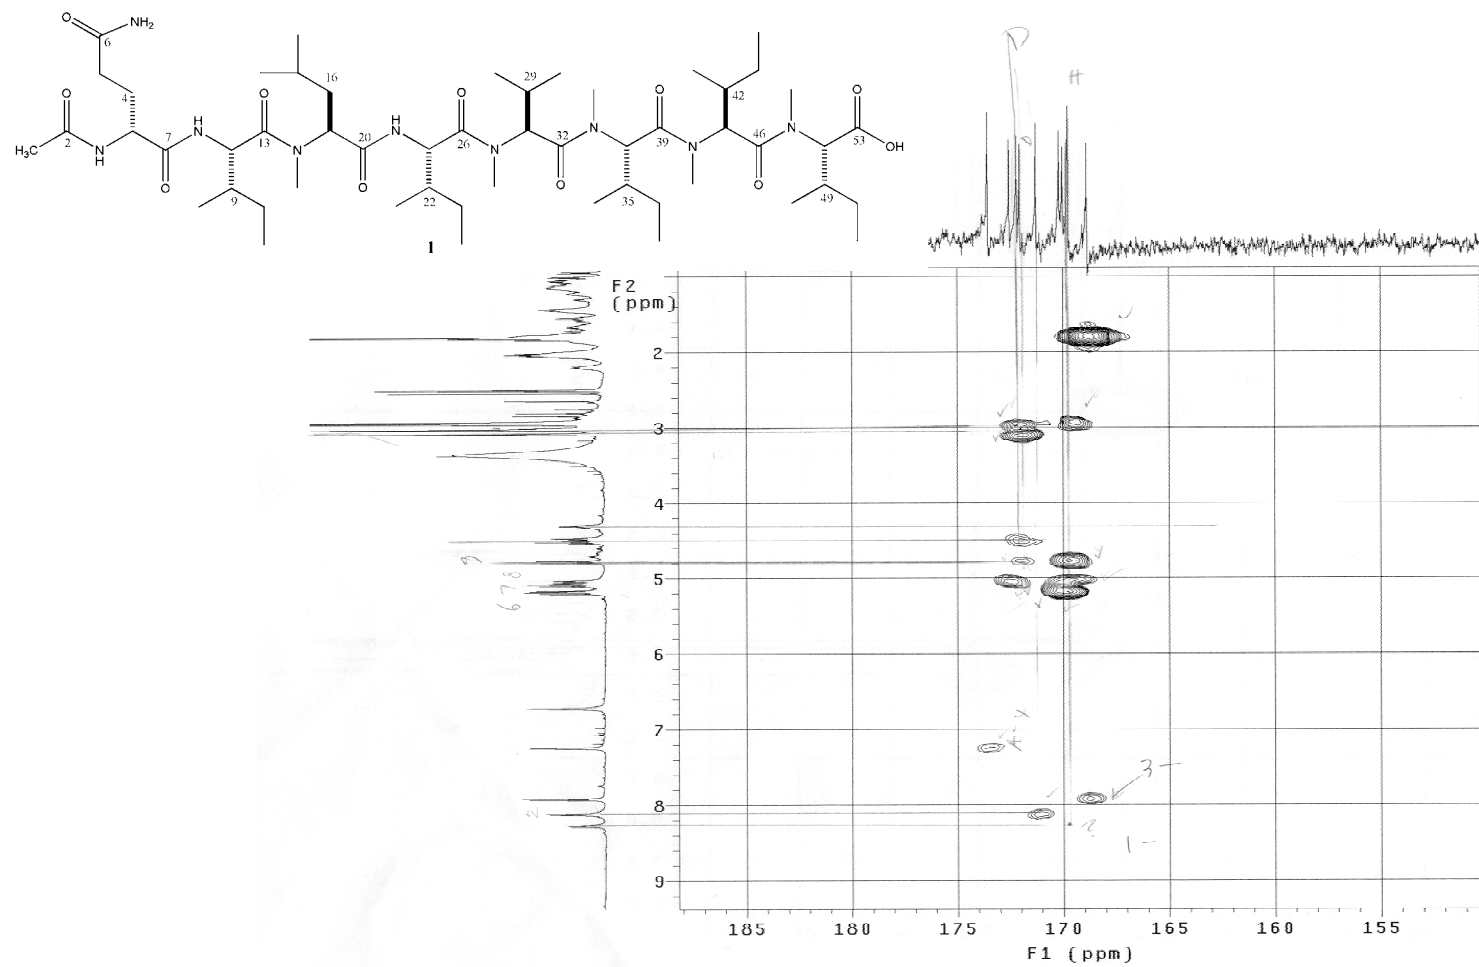

Figure S8. Expansion of downfield region of gHMBC spectrum for **1**.

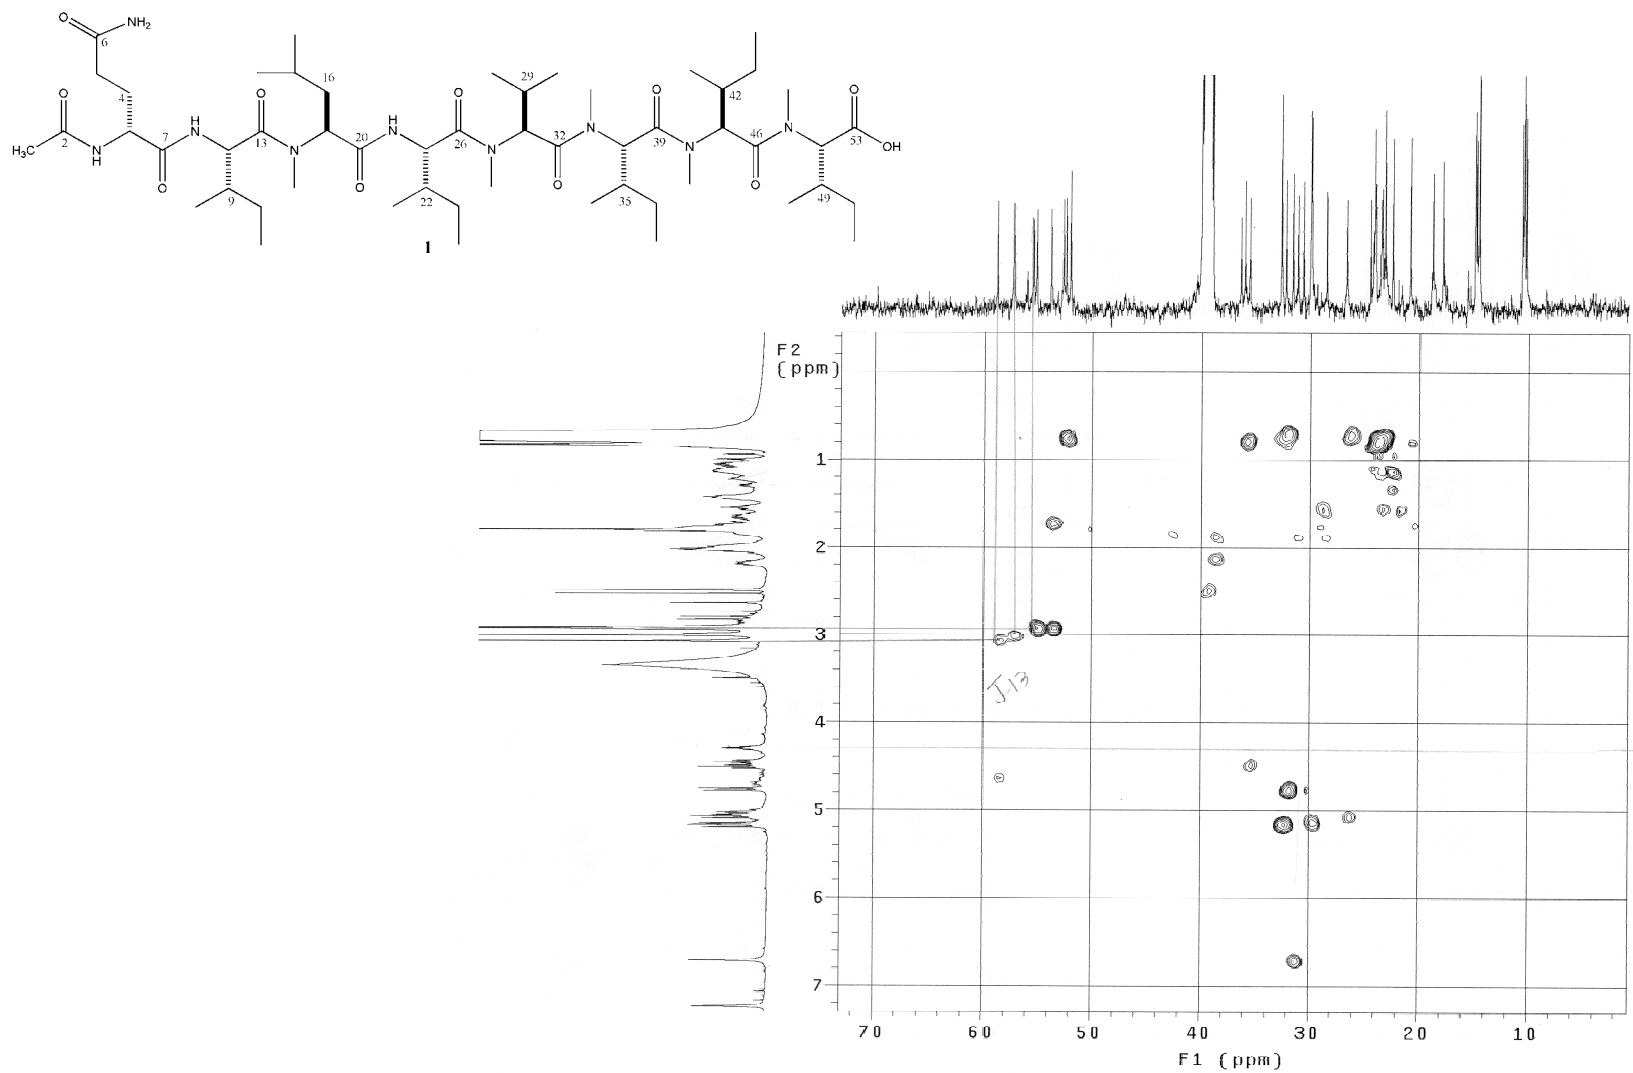

Figure S9. Expansion of upfield region of gHMBC spectrum for **1**.

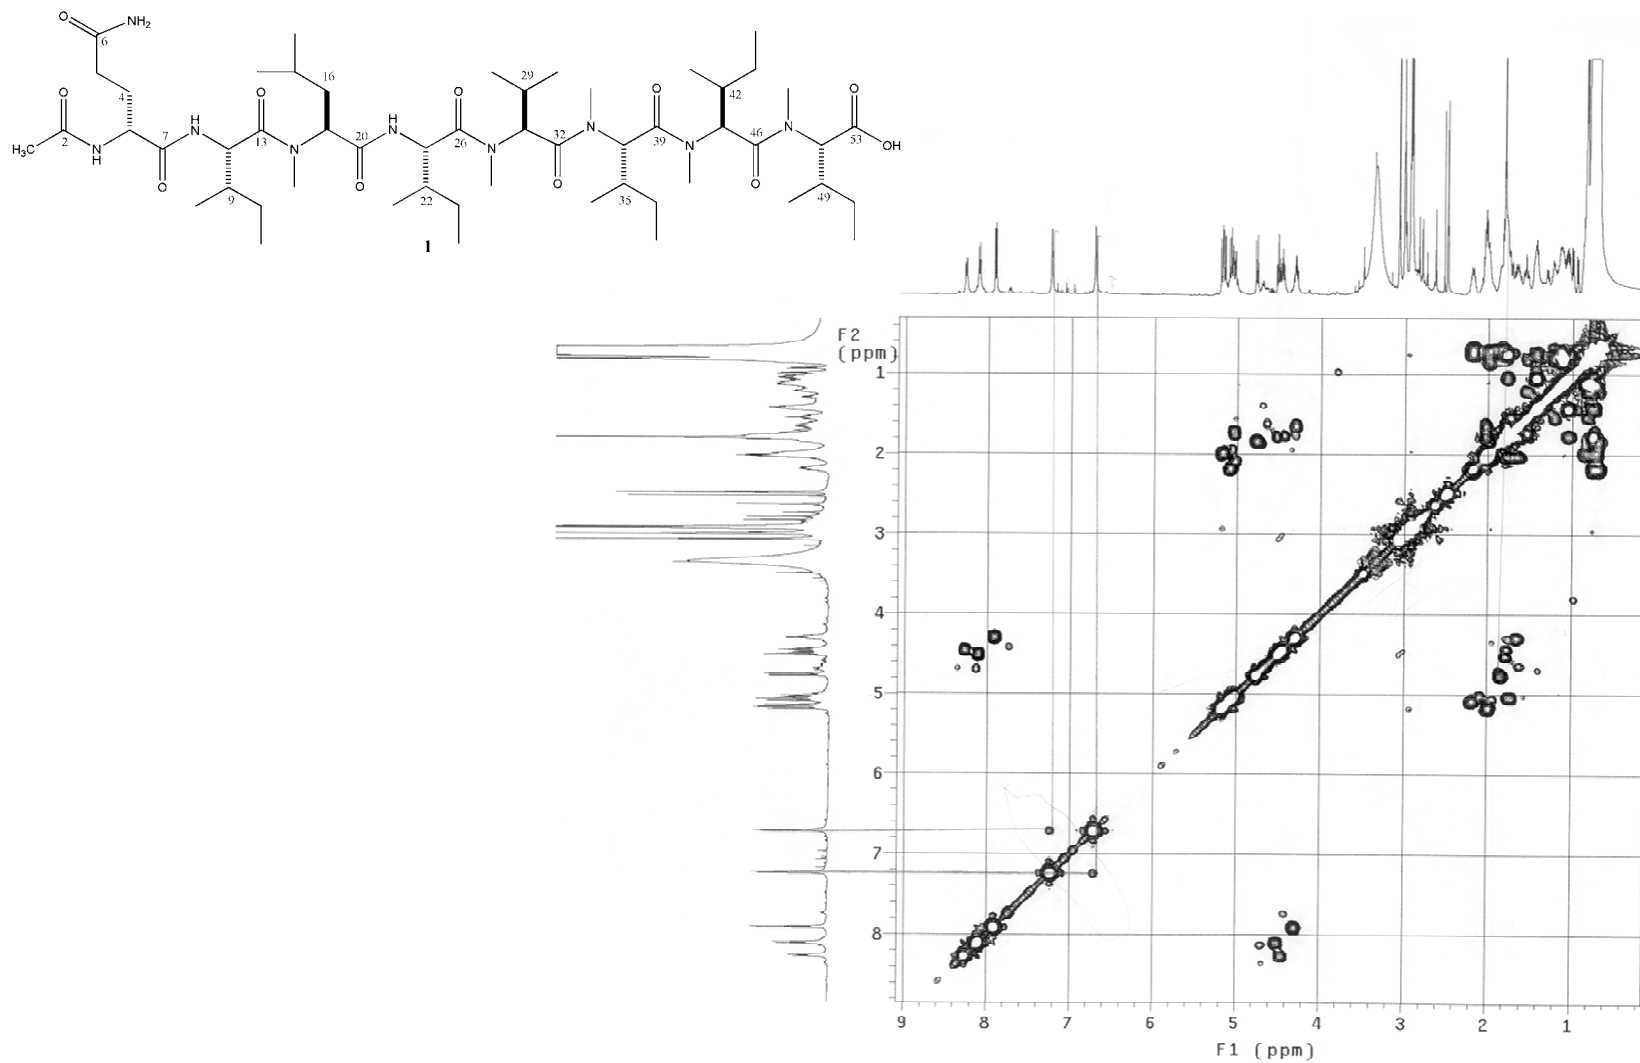

Figure S10. gCOSY spectrum for **1**.



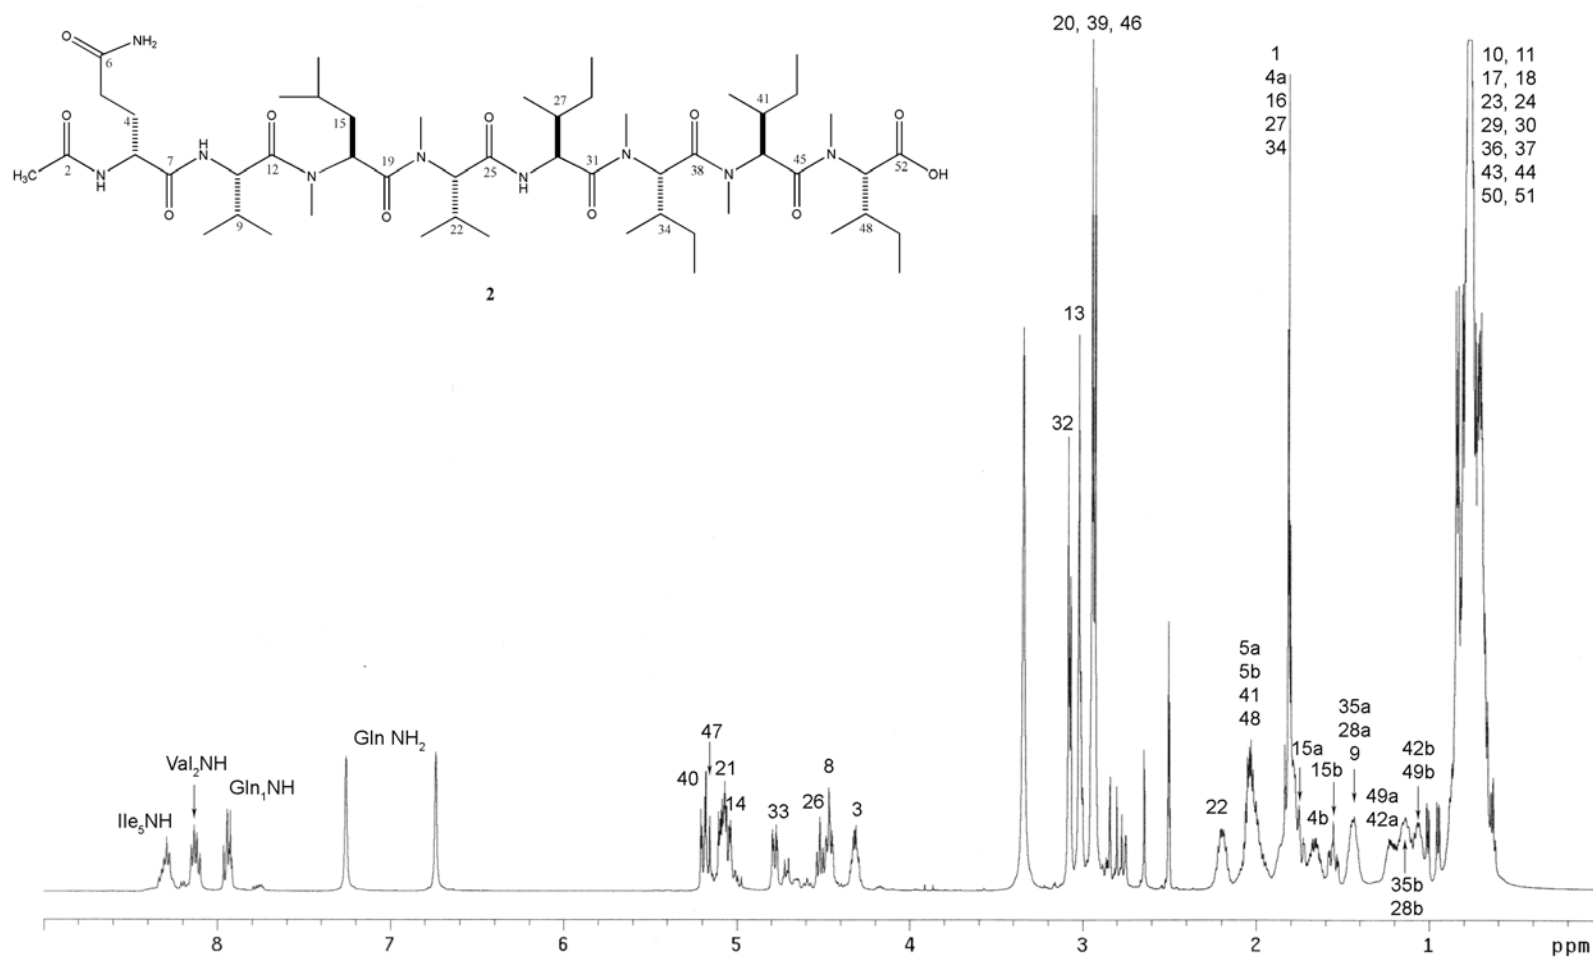

Figure S12. <sup>1</sup>H NMR spectrum for **2**.

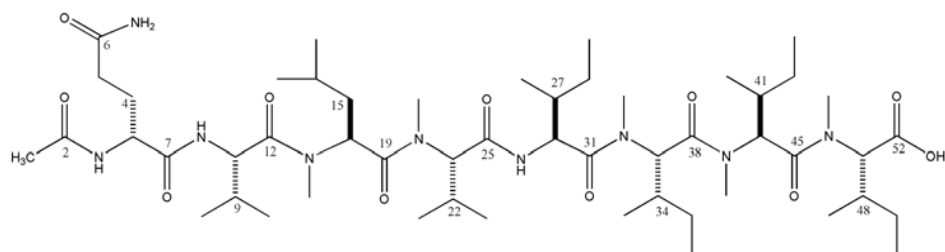

**2**

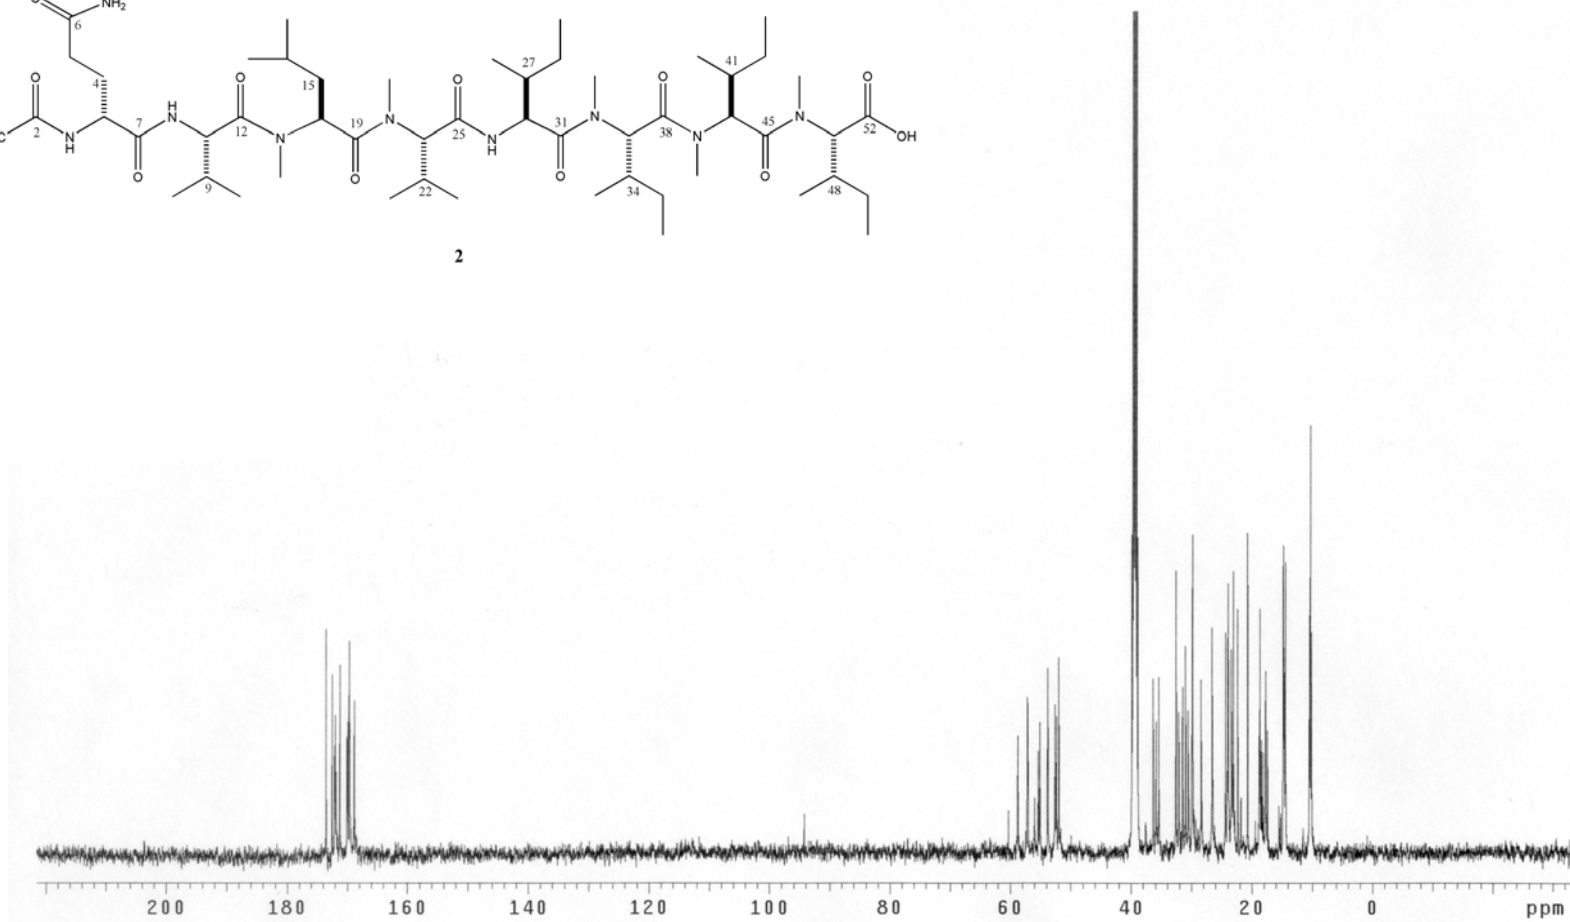

Figure S13.  $^{13}\text{C}$  NMR Spectrum for **2**.





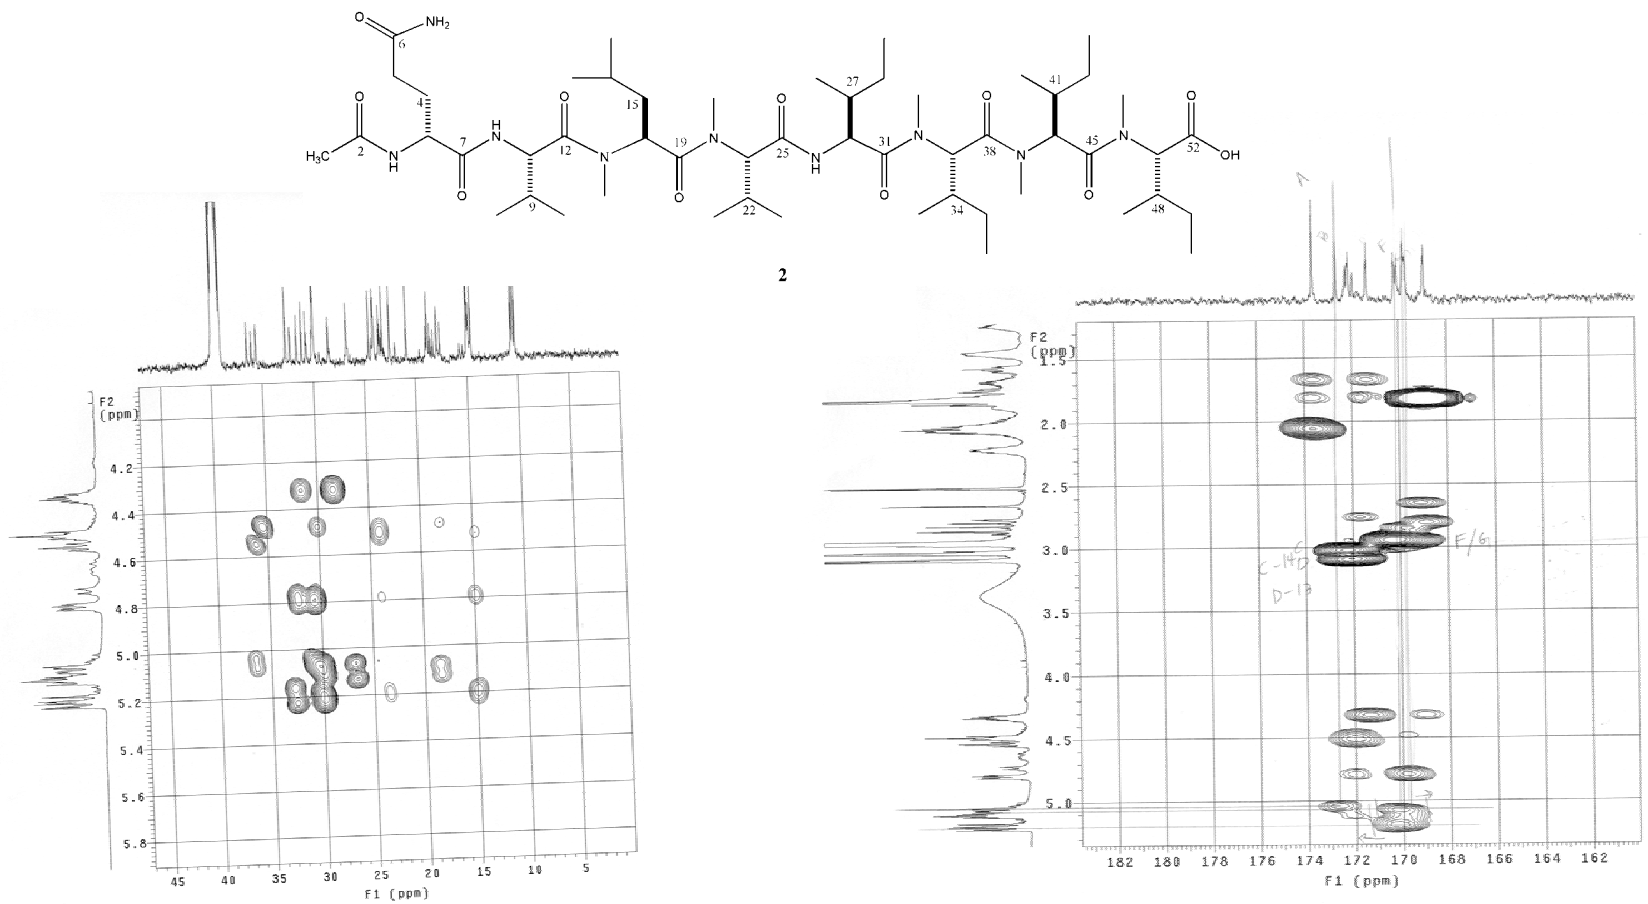

Figure S15. Expanded regions of gHMBC spectrum for **2** a.) alpha protons with aliphatic carbons b.) alpha and aliphatic protons with carbonyl carbons.

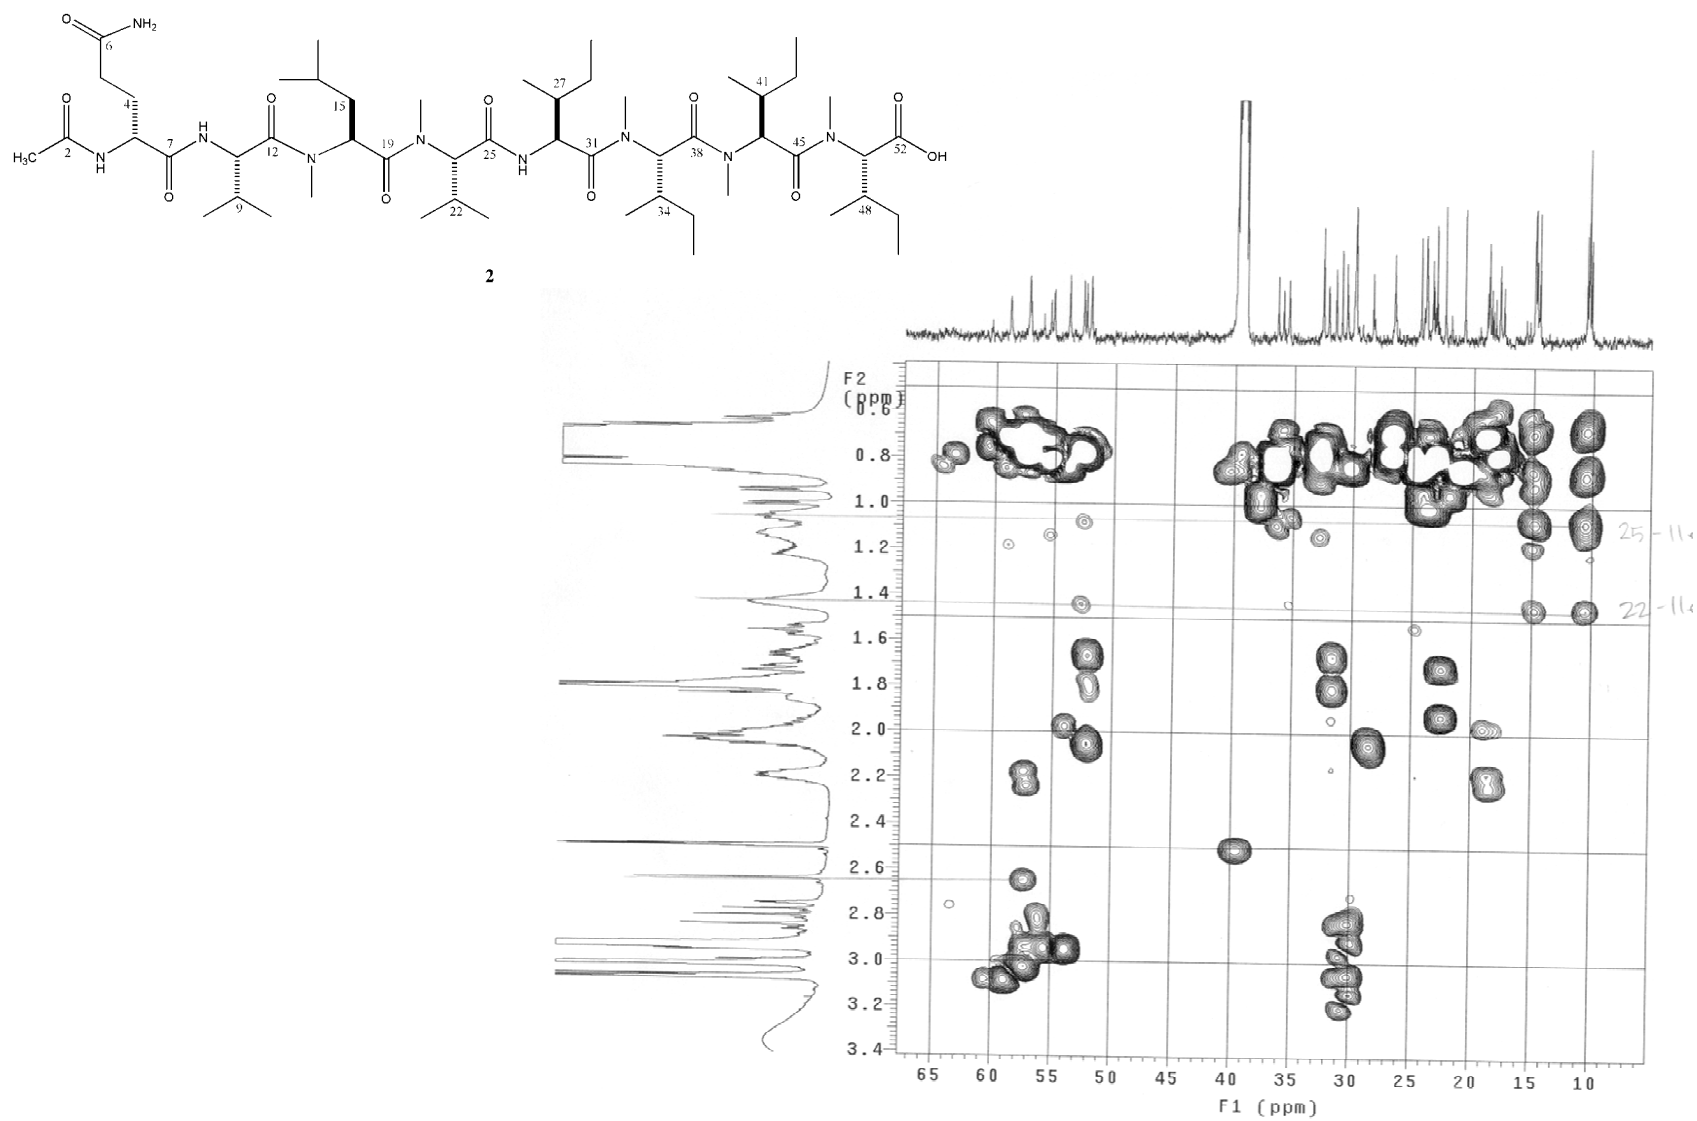

Figure S16. Expansion of upfield region of gHMBC spectrum for **2**.



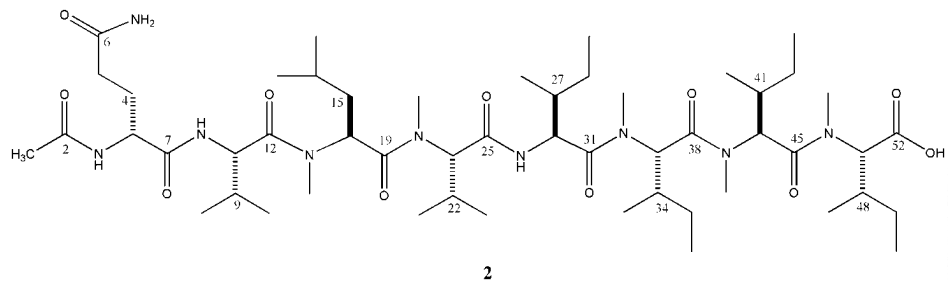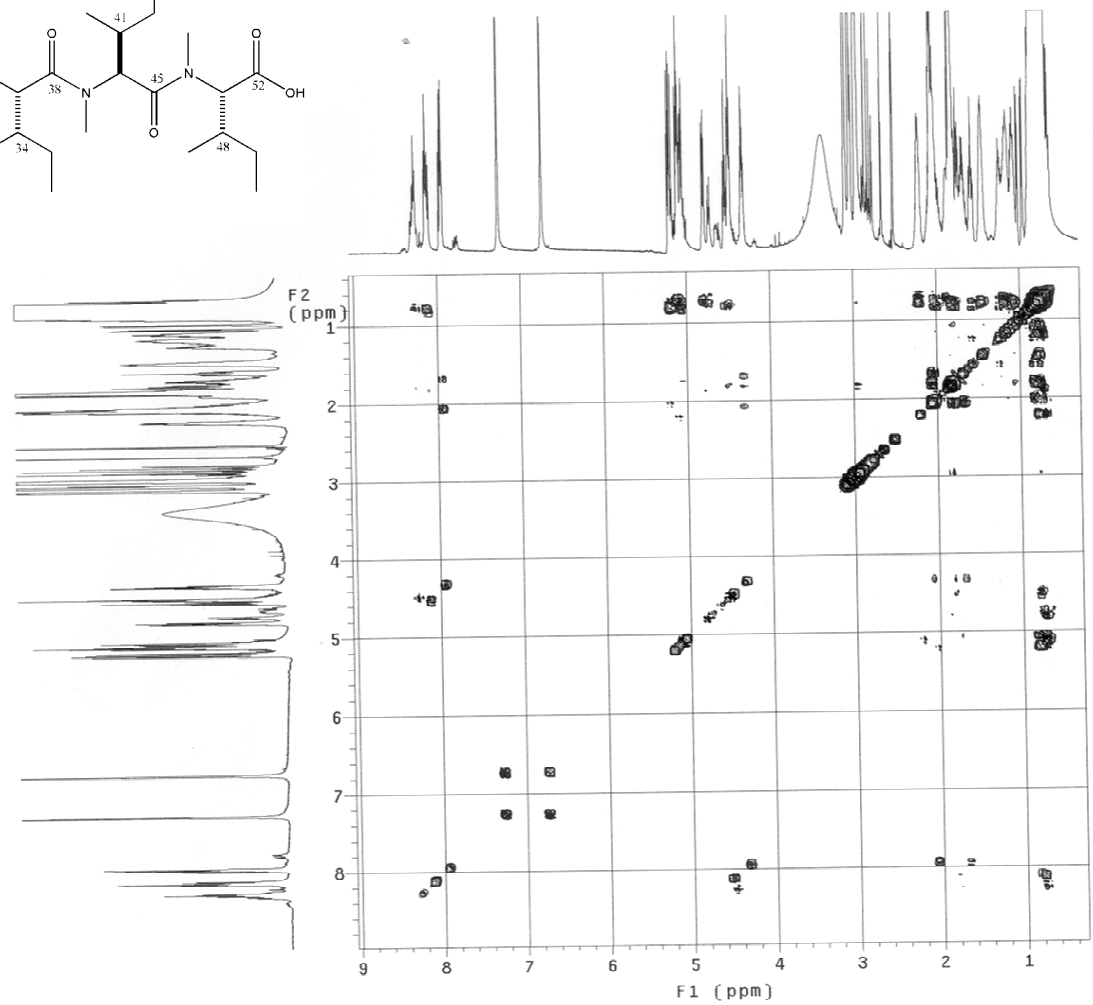

Figure S18. TOCSY spectrum for **2**.

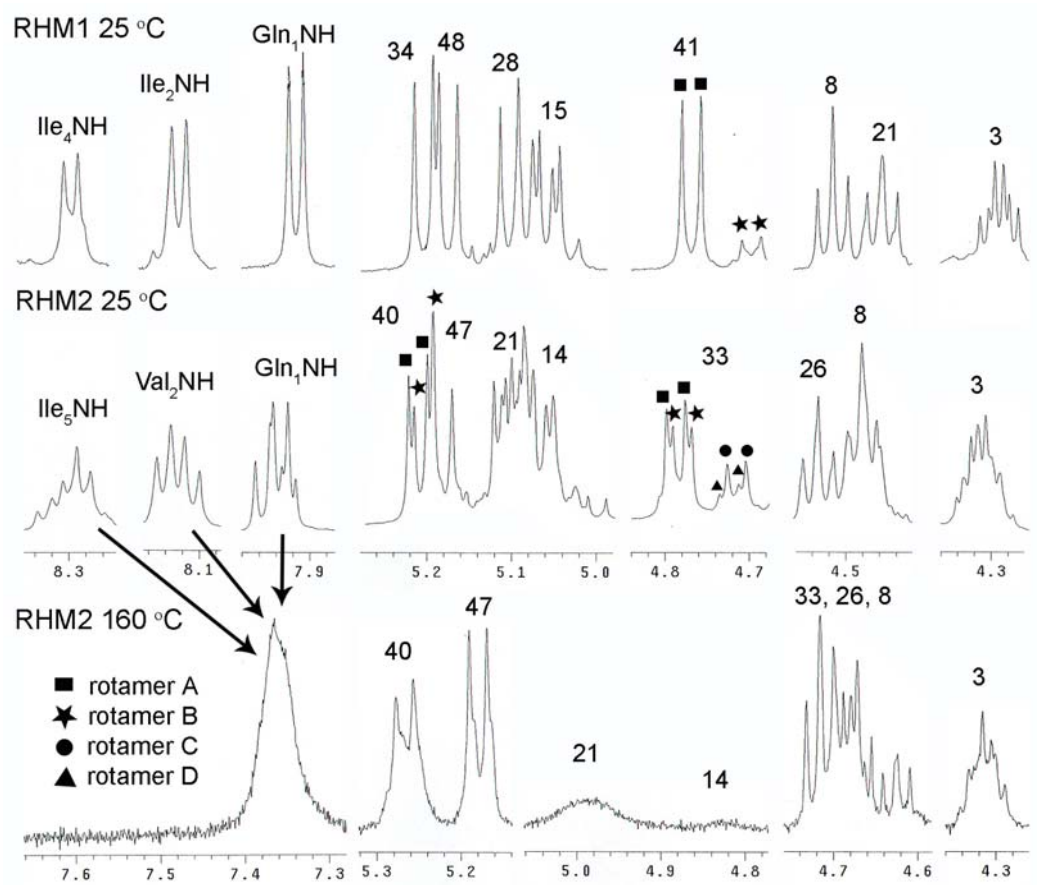

Figure S19. <sup>1</sup>H NMR (DMSO-*d*<sub>6</sub>, 500 MHz) of selected regions for RHM1 (1) and RHM2 (2) illustrating the presence of rotational isomers (codes show rotamers A-D).

RHM1 25 °C

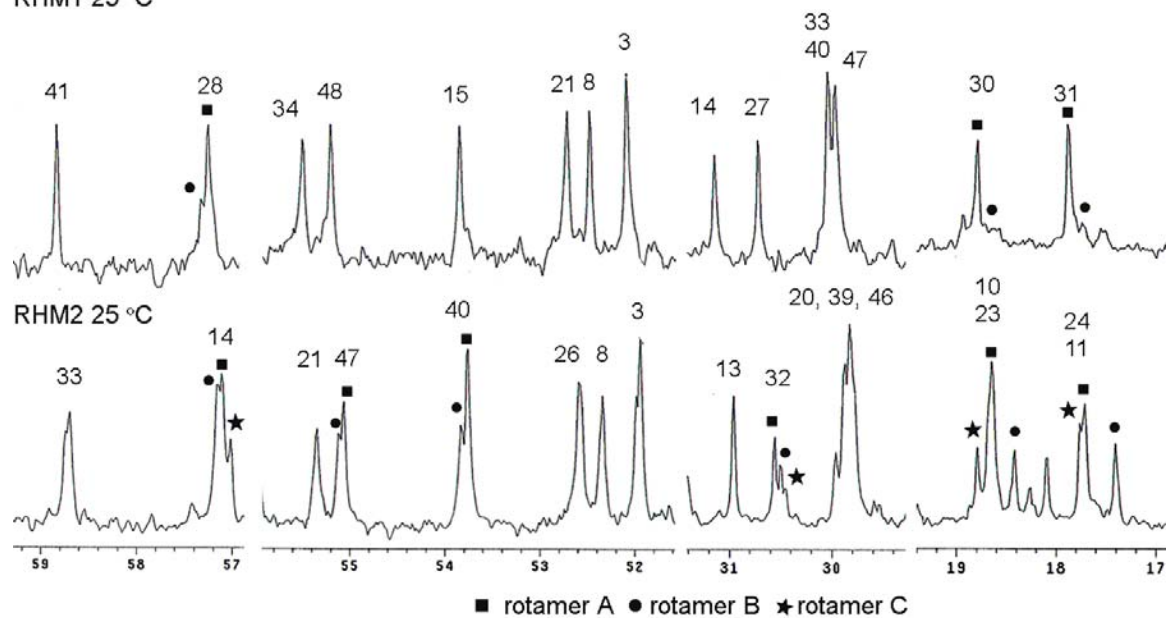

Figure S20. Selected regions of <sup>13</sup>C NMR (125 MHz, DMSO-*d*<sub>6</sub>) illustrating rotational isomers for RHM1 (1) and RHM2 (2).
